# Supplementary material
Source: publisher figshare collection journal article supplement (https://springernature.figshare.com/ndownloader/files/14739383)

Frequency of *P. vivax* infections among participants

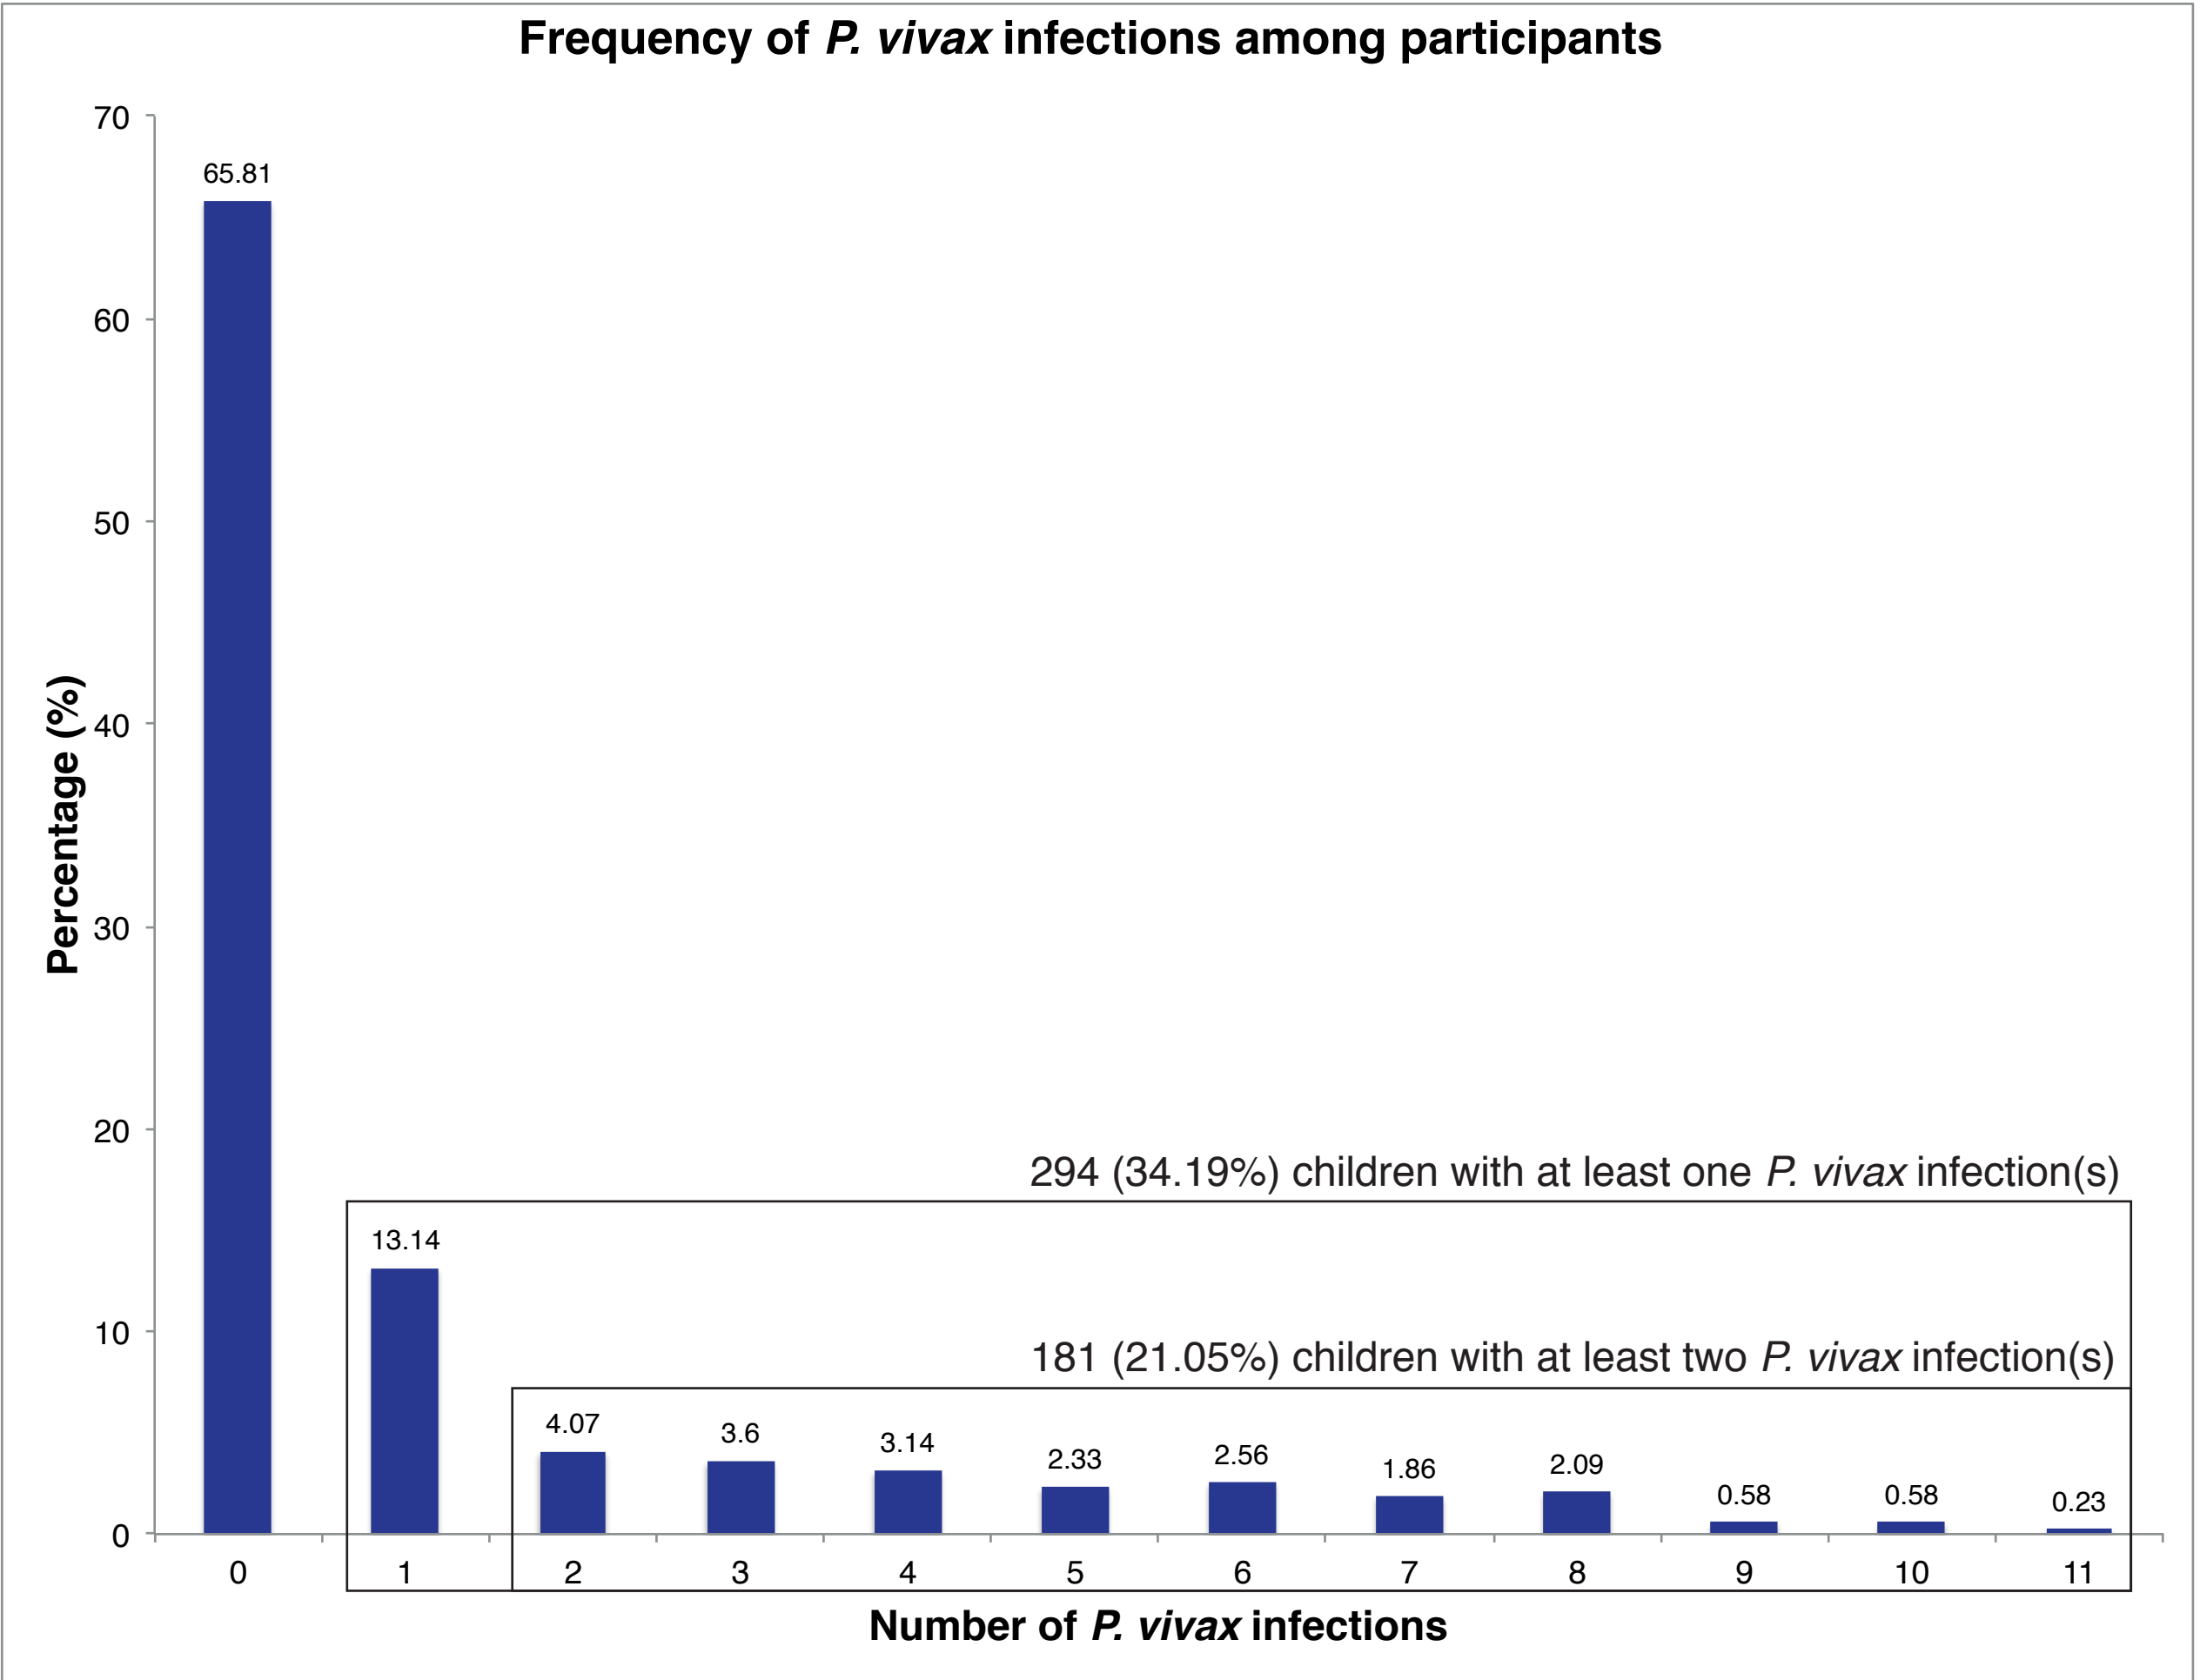

Supplement: Supplementary file [file 14739383]
